# Supplementary material for: Facile synthesis of stable cubic mesoporous silica SBA-1 over a broad temperature range with the aid of d-fructose
Source: Royal Society of Chemistry journal article supplement (doi:10.1039/b414786c), 2005-01-01

# Supplementary Material (ESI) for Chemical Communications  
# This journal is © The Royal Society of Chemistry 2005  
Facile synthesis of stable cubic mesoporous silica SBA-1 over a broad  
temperature range with the aid of D-fructose

Hsien-Ming Kao,\* Chun-Chiang Ting, Anthony S. T. Chiang, Chih-Chun Teng and  
Cheng-Ho Chen

Figure S1. N<sub>2</sub> adsorption-desorption isotherms of calcined SBA-T samples

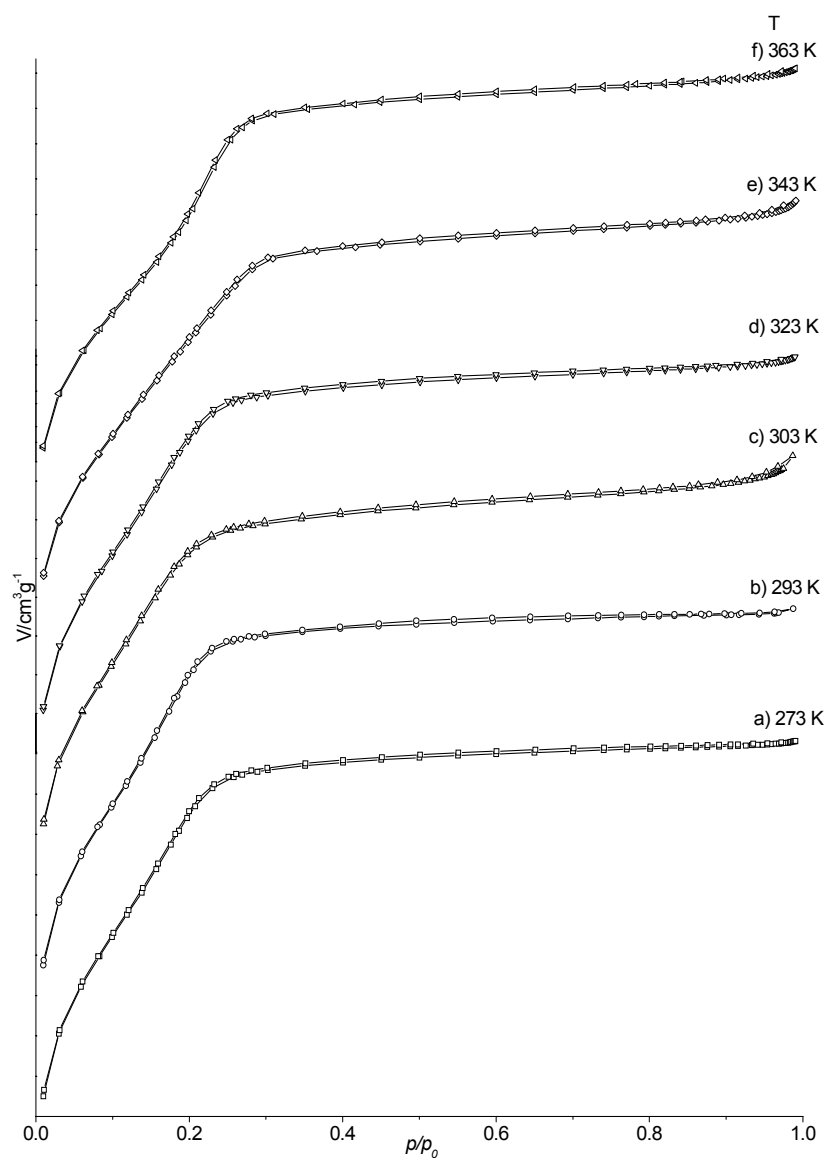

Figure S2.  $^{29}\text{Si}$  MAS NMR spectra of as-synthesized A) SBAw/A-H1 and B) SBAw/P-H2 samples, respectively. Both samples have been immediately washed with water after synthesis.

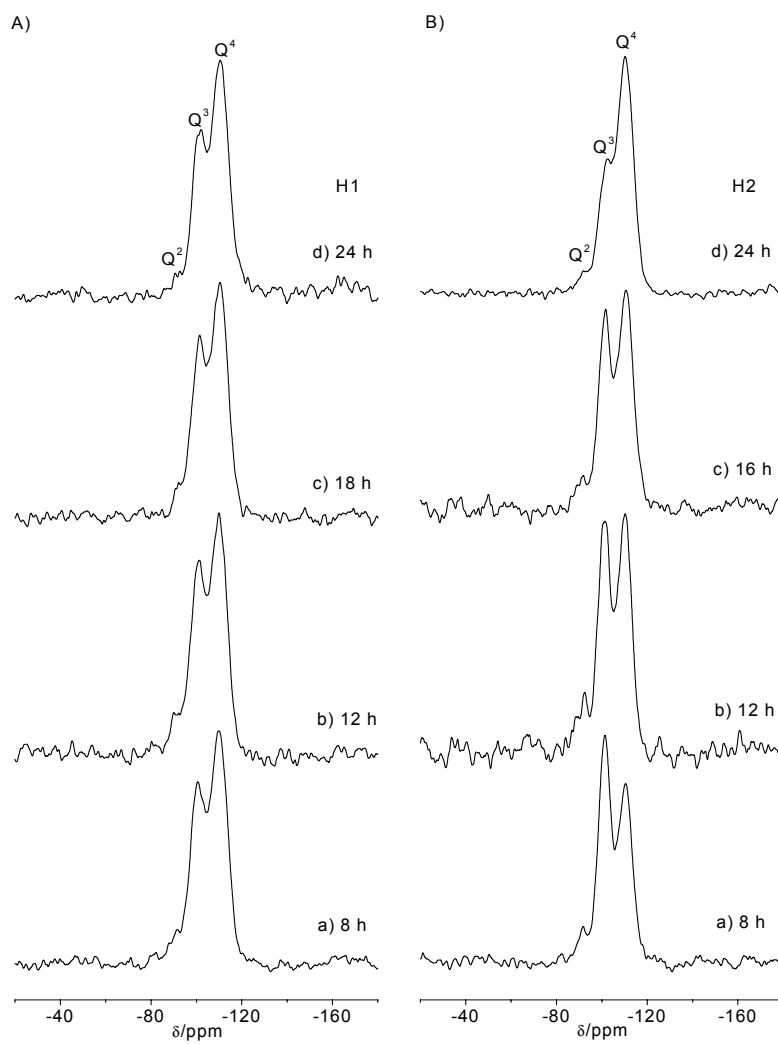

Supplement: b414786c.pdf [file b414786c.pdf]
